# Supplementary material for: Resistin Induces Migration and Invasion in PC3 Prostate Cancer Cells: Role of Extracellular Vesicles
Source: MDPI journal article supplement (doi:10.3390/life13122321), 2023-12-10
Supplement: s1 [file s1]

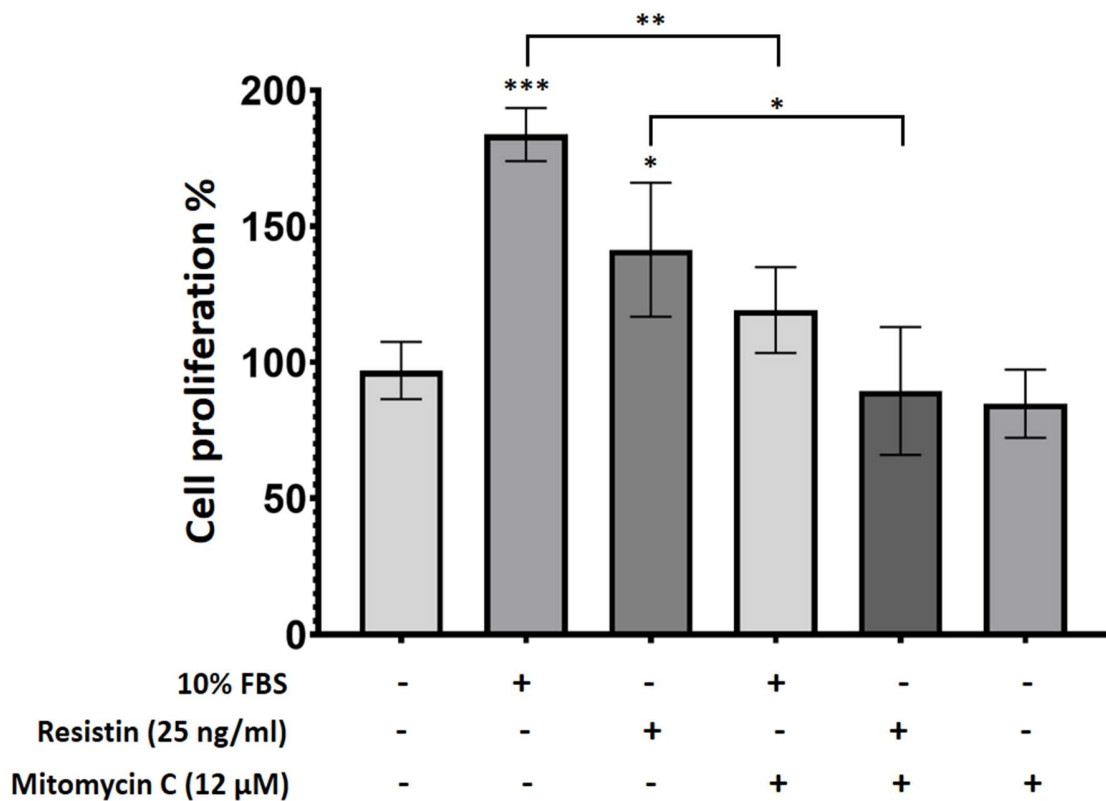

**Supplementary Figure S1. Effect of resistin and mitomycin C on the proliferation of PC3 cells.** Cell proliferation was evaluated at 48 h using the MTT assay. \*  $p < 0.05$ , \*\*  $p < 0.01$ , and \*\*\*  $p < 0.001$ .

### MTT Assay

Cell viability was assessed by an MTT reduction assay under different conditions for 24 h. First, cells were seeded onto 96-well plates at a 150,000 cells/well density and allowed to grow at 90% of confluence. Next, the culture medium was replaced with an Opti-MEM medium. After 2 h under this condition, cells were treated with several stimuli. Later, 30  $\mu$ L of an MTT 2.1 mg/mL stock solution was added to the culture medium to obtain a final concentration of 0.5 mg/mL. Formazan crystals formed after 4 h of incubation and were further dissolved by adding buffer lysis (20% sodium dodecyl sulfate, 50% N,N-dimethylformamide, pH 4.0). Finally, optical density was measured at 570 nm using a microplate reader.

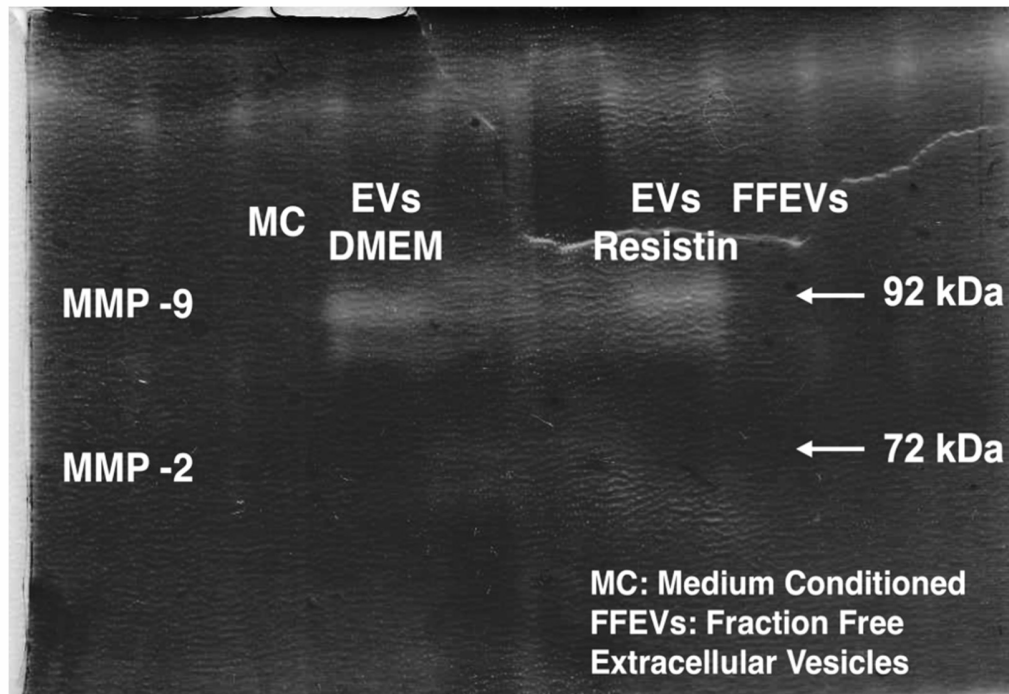

**Supplementary Figure S2.** Analysis of EVs fractions by zymography. Protein levels in EVs were quantified by micro-Bradford protein assay. In each condition, 25 µg of protein were analyzed.

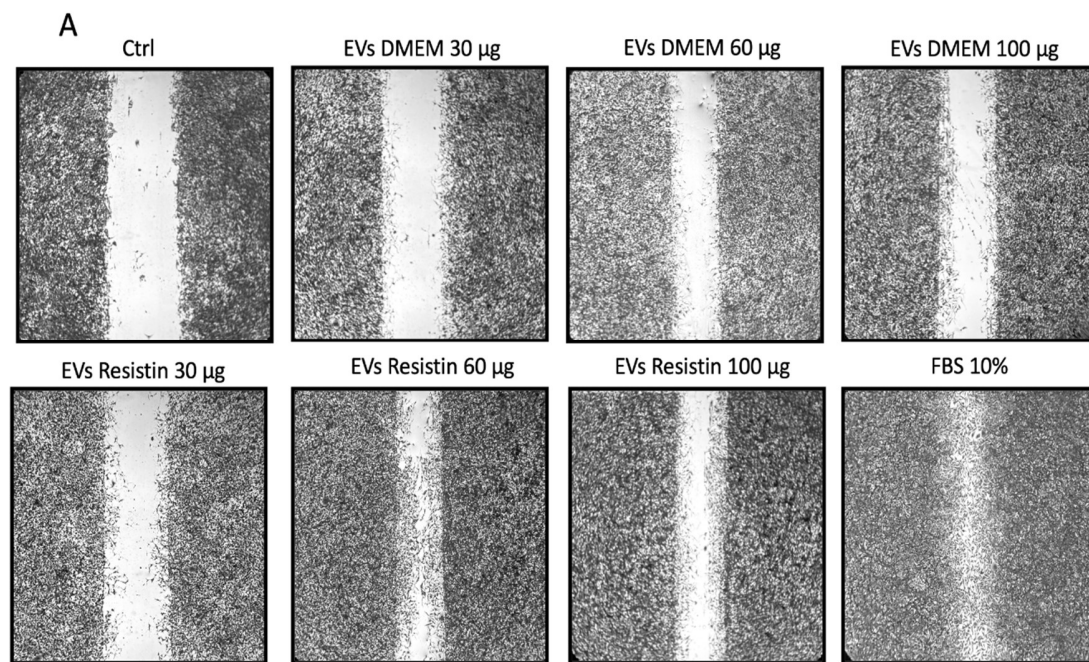

**Supplementary Figure S3. The effect of resistin EVs on migration is dependent on protein levels.** Cell migration was evaluated through scratch-wound assay. Cells were treated with different protein levels from EVs fraction (30, 60 and 100  $\mu$ g/ml) and migration of cells was analyzed after 48 h.
